# Supplementary material for: Reply to ‘Wiggle-match radiocarbon dating of the Taupo eruption’
Source: PubMed Central journal article supplement (PMC6789094; doi:10.1038/s41467-019-12491-0), 2019-10-11
Supplement: 41467_2019_12491_MOESM1_ESM.pdf [file 41467_2019_12491_MOESM1_ESM.pdf]

## **Supplementary Information**

### **Reply to: Wiggle-match radiocarbon dating of the Taupo eruption**

Richard N. Holdaway<sup>1,2</sup>, Brendan Duffy<sup>3</sup> & Ben Kennedy<sup>4</sup>

**Supplementary Figure 1**

**Supplementary Table 1**

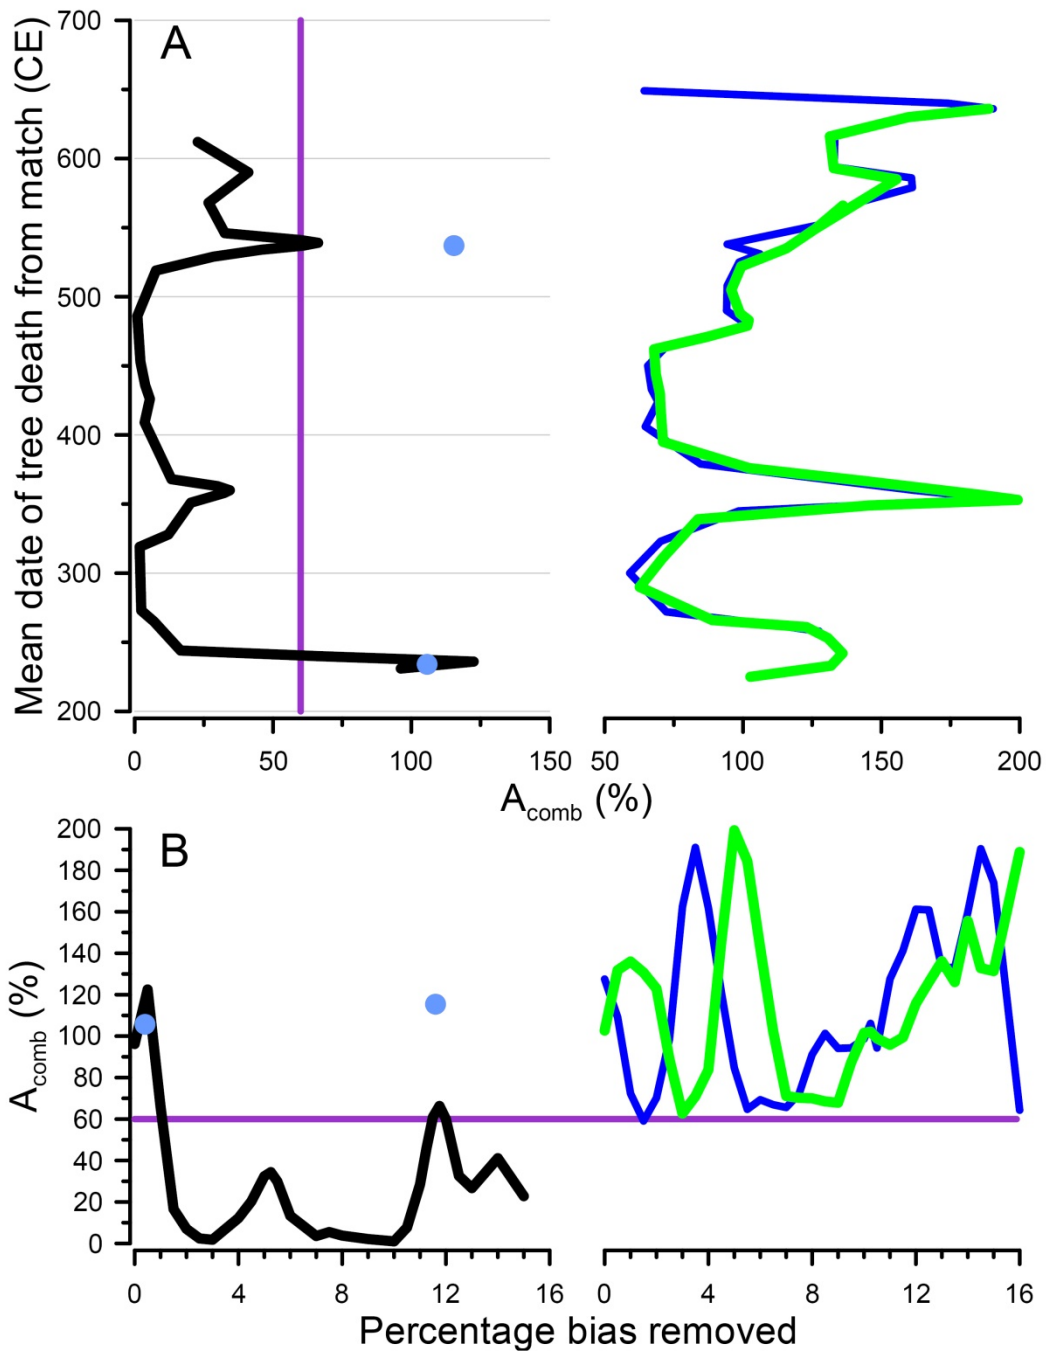

**Supplementary Figure 1** Other matches for wiggle date series, with bias removed. Values of  $A_{\text{comb}}$  for different percentages of contamination removed from wiggle match series conventional radiocarbon ages from (black) Hogg *et al.*, (blue) Sparks *et al.* as reported, and (green) Sparks *et al.* laboratory offset removed. **A**, mean dates of tree death for  $A_{\text{comb}}$  values for increasing percentages of contamination removed. Curves start at 0% contamination as assumed in initial publication of wiggle matches. **B**,  $A_{\text{comb}}$  values for increasing percentages of contamination removed. Purple, critical value of  $A_{\text{comb}}$ . Blue symbols,  $A_{\text{comb}}$  values and tree death date when conventional radiocarbon ages are ramped in second halves of series (as in our model for 0% (to 0.52%) and 11.5% (to 12.6%) contamination, respectively). As with ramping at 0% contamination, ramping of various extents for contamination c. 5% did not generate higher  $A_{\text{comb}}$  values than peak without ramping: only the peak at c.12% gave a higher  $A_{\text{comb}}$  value with ramping.

**Supplementary Table 1** Radiocarbon data set for date of Taupo eruption. Radiocarbon ages considered for, and used, in analyses, with location relative to Taupo eruption vent system, median calibrated ages (SHCal13 curve), dated material, source references, and comments on reason(s) for exclusion. Colours highlight the ubiquitous distance-age relationship, especially for wood and charcoal. Red = old and close, blue = young and far.

**Supplementary Table 1** Radiocarbon data set for date of Taupo eruption. Radiocarbon ages considered for, and used, in analyses, with location relative to Taupo eruption vent system, median calibrated ages (SHCal13 curve), dated material, source references, and comments on reason(s) for exclusion. Colours highlight the ubiquitous distance-age relationship, especially for wood and charcoal. Red = old and close, blue = young and far.

| Lab no.      | Location relative to vent |               | CRA         | Error     | Median age (SHCal13) |            | Material        | Base reference (Entry no.)        | Froggatt & Lowe (1990) |                    | Foot note | Comment                                                            |
|--------------|---------------------------|---------------|-------------|-----------|----------------------|------------|-----------------|-----------------------------------|------------------------|--------------------|-----------|--------------------------------------------------------------------|
|              | Bearing (°)               | Distance (km) |             |           | BP                   | CE         |                 |                                   | Ref. nos.              | Rating             |           |                                                                    |
| NZA6636      | 130.7                     | 67.4          | 1775        | 93        | 1650                 | 300        | bone gelatin    | Holdaway (1999)                   |                        | 14,8               | 1         |                                                                    |
| NZA7183      | 130.7                     | 67.4          | 1570        | 68        | 1422                 | 528        | bone gelatin    | Holdaway & Beavan (1999)          |                        | 14,8               | 1         |                                                                    |
| NZA8559      | 130.7                     | 67.4          |             |           | 1791                 | 159        | bone gelatin    | Holdaway & Beavan (1999)          |                        | 14,8               | 1         |                                                                    |
| NZA7532      | 130.7                     | 67.4          | 1871        | 67        | 1580                 | 370        | carbonized leaf | Holdaway & Beavan (1999)          |                        | 14,8               | 1         |                                                                    |
| NZA8226      | 130.7                     | 67.4          | 1715        | 69        | 1764                 | 186        | carbonized leaf | Holdaway & Beavan (1999)          |                        | 14,8               | 1         |                                                                    |
| NZ176        | 44.6                      | 21.6          | 1960        | 70        | 1795                 | 155        | charcoal        | Froggatt & Lowe (1990)            | 22                     | 14,8               | 1         |                                                                    |
| NZ82         | 22.03                     | 28.6          | 2040        | 50        | 1914                 | 36         | charred wood    | Froggatt & Lowe (1990)            | 7                      | 14,8               | 2         |                                                                    |
| NZ3          | 237.4                     | 33.5          | 1970        | 150       | 1883                 | 67         | charcoal        | Froggatt & Lowe (1990)            | 3                      | 14,8               | 1         |                                                                    |
| NZ175        | 32.5                      | 33.5          | 1850        | 100       | 1737                 | 213        | charcoal        | Froggatt & Lowe (1990)            | 21                     | 14,8               | 1         |                                                                    |
| NZ1          | 132.32                    | 34            | 1820        | 150       | 1706                 | 244        | charcoal        | Froggatt & Lowe (1990)            | 2                      | 14,8               | 1         |                                                                    |
| NZ4          | 204.3                     | 44.3          | 1920        | 150       | 1823                 | 127        | charcoal        | Froggatt & Lowe (1990)            | 4                      | 14                 | 2         |                                                                    |
| NZ163        | 14                        | 44.4          | 1840        | 50        | 1726                 | 224        | charcoal        | Froggatt & Lowe (1990)            | 13                     | 14,8               | 1         |                                                                    |
| NZ162        | 353.4                     | 45.2          | 1830        | 70        | 1712                 | 238        | charcoal        | Froggatt & Lowe (1990)            | 12                     | 14,8               | 1         |                                                                    |
| NZ173        | 7.3                       | 51            | 1750        | 50        | 1624                 | 326        | charcoal        | Froggatt & Lowe (1990)            | 19                     | 14,8               | 1         |                                                                    |
| NZ174        | 7.3                       | 51            | 1800        | 100       | 1677                 | 273        | charcoal        | Froggatt & Lowe (1990)            | 20                     | 14,8               | 1         |                                                                    |
| NZ170        | 231.9                     | 59.5          | 1800        | 50        | 1666                 | 284        | charcoal        | Froggatt & Lowe (1990)            | 17                     | 14,8               | 1         |                                                                    |
| <b>WK928</b> | 16.2                      | 68.5          | 1870        | 60        | 1764                 | 186        | charred wood    | Froggatt & Lowe (1990)            | 41                     | f                  | 1         |                                                                    |
| NZ1548       | 42.5                      | 78.7          | 1840        | 50        | 1726                 | 224        | charcoal        | Froggatt & Lowe (1990)            | 31                     | 56,7,21            | 1         |                                                                    |
| NZ172        | 37.5                      | 79.9          | 1800        | 100       | 1667                 | 283        | charcoal        | Froggatt & Lowe (1990)            | 18                     | 14,8               | 1         |                                                                    |
| NZ183        | 111.3                     | 81.1          | 1840        | 70        | 1673                 | 277        | charcoal        | Froggatt & Lowe (1990)            | 23                     | 14,8               | 1         |                                                                    |
| NZ158        | 141.5                     | 115.8         | 1760        | 80        | 1634                 | 316        | charcoal        | Froggatt & Lowe (1990)            | 8                      | 14,8               | 1         |                                                                    |
| NZ38         | 335.1                     | 127.1         | 1800        | 70        | 1673                 | 277        | charcoal        | Froggatt & Lowe (1990)            | 6                      | 14,8               | 1         |                                                                    |
| NZ37         | 332.1                     | 148.9         | 1780        | 60        | 1652                 | 298        | charcoal        | Froggatt & Lowe (1990)            | 5                      | 14,8               | 1         |                                                                    |
| NZ1764       | 339.8                     | 369.6         | 1805        | 65        | 1677                 | 273        | charred wood    | Pullar <i>et al.</i> (1977)       | -                      | -                  | -         |                                                                    |
| NZ5531       |                           |               | 1890        | 70        |                      |            | charcoal        | Froggatt & Lowe (1990)            | 33                     | z                  | 2         | d Not published anywhere for its context to be properly evaluated. |
| <b>WK215</b> | <b>332.4</b>              | <b>120</b>    | <b>1730</b> | <b>60</b> | <b>1600</b>          | <b>350</b> | <b>gyttja</b>   | <b>Froggatt &amp; Lowe (1990)</b> | <b>39</b>              | <b>16,25,28,12</b> | <b>2</b>  |                                                                    |
| NZ5610A      | 131.2                     | 104.6         | 1790        | 65        | 1661                 | 289        | peat/wood       | Froggatt & Lowe (1990)            | 34                     | 20                 | 2         |                                                                    |
| NZ5610B      | 131.2                     | 104.6         |             |           | 1731                 | 219        | peat/wood       |                                   |                        |                    | 4         | c Recalculation                                                    |

|                |              |              |             |           |             |            |                       |                                   |           |               |          |          |                                                            |
|----------------|--------------|--------------|-------------|-----------|-------------|------------|-----------------------|-----------------------------------|-----------|---------------|----------|----------|------------------------------------------------------------|
| NZ1059         | 42.5         | 122          | 1870        | 60        | 1764        | 186        | peat                  | Froggatt & Lowe (1990)            | 29        | 37, 39, g     | 1        |          |                                                            |
| NZ7013         | 331.5        | 128.2        | 1600        | 55        | 1450        | 500        | peat                  | Froggatt & Lowe (1990)            | 36        | c             | 2        | a        |                                                            |
| <b>WK1015</b>  | <b>348.3</b> | <b>162.8</b> | <b>1690</b> | <b>80</b> | <b>1550</b> | <b>400</b> | <b>peat</b>           | <b>Froggatt &amp; Lowe (1990)</b> | <b>42</b> | <b>d</b>      | <b>1</b> | <b>b</b> |                                                            |
| <b>WK1016</b>  | <b>348.3</b> | <b>162.8</b> | <b>1790</b> | <b>80</b> | <b>1664</b> | <b>286</b> | <b>peat</b>           | <b>Froggatt &amp; Lowe (1990)</b> | <b>43</b> | <b>d</b>      | <b>1</b> | <b>b</b> |                                                            |
| NZ502          | 80.9         | 170.3        | 1770        | 70        | 1645        | 305        | peat                  | Froggatt & Lowe (1990)            | 24        | 9,39          | 1        |          |                                                            |
| NZ3121         | 347.2        | 179.2        | 1680        | 70        | 1536        | 414        | peat                  | Froggatt & Lowe (1990)            | 32        | 55            | 3        |          |                                                            |
| <b>WK1502</b>  |              |              | <b>1890</b> | <b>50</b> |             |            | <b>peat</b>           | <b>Froggatt &amp; Lowe (1990)</b> | <b>1</b>  | <b>1</b>      | <b>2</b> | <b>d</b> | <b>No location data</b>                                    |
| NZ503          |              |              | 1900        | 60        |             |            | peat                  | Froggatt & Lowe (1990)            | 25        | 9, 39         | 2        | d        | <b>No location data</b>                                    |
| NZ1060         |              |              | 2090        | 60        |             |            | peat                  | Froggatt & Lowe (1990)            | 30        | 37, 39, g     | 2        | d        | <b>Same site as NZ1059 but below tephra and much older</b> |
| NZ7442         | 306.6        | 63.5         | 1795        | 55        | 1663        | 287        | seeds                 | Froggatt & Lowe (1990)            | 37        | g             | 1        | a        |                                                            |
| NZ168          | 38.7         | 38.5         | 1980        | 40        | 1794        | 156        | wood                  | Froggatt & Lowe (1990)            | 16        | 14,8,43       | 1        |          |                                                            |
| NZ164          | 12.3         | 43.9         | 1890        | 70        | 1784        | 166        | wood                  | Froggatt & Lowe (1990)            | 14        | 14,8          | 1        |          |                                                            |
| NZ161          | 353.4        | 45.2         | 1780        | 80        | 1655        | 295        | wood                  | Froggatt & Lowe (1990)            | 11        | 14,8          | 1        | a        |                                                            |
| <b>WK23140</b> | <b>321</b>   | <b>51.8</b>  | <b>1874</b> | <b>18</b> | <b>1827</b> | <b>123</b> | <b>wood cellulose</b> | <b>Hogg et al. (2011)</b>         |           |               |          |          |                                                            |
| NZ165          | 342.9        | 91.5         | 1900        | 70        | 1795        | 155        | wood                  | Froggatt & Lowe (1990)            | 15        | 14,8          | 1        |          |                                                            |
| NZ5611A        | 131.2        | 104.6        | 1735        | 65        | 1606        | 344        | wood                  | Froggatt & Lowe (1990)            | 35        | 20            | 2        |          |                                                            |
| <i>NZ5611B</i> | <i>131.2</i> | <i>104.6</i> |             |           | 1657        | 293        | <i>wood</i>           |                                   |           |               | 4        | <i>c</i> | <i>Recalculation</i>                                       |
| <i>NZ5611C</i> | <i>131.2</i> | <i>104.6</i> |             |           | 1587        | 363        | <i>wood</i>           |                                   |           |               | 4        | <i>c</i> | <i>Recalculation</i>                                       |
| NZ159          | 141          | 115.8        | 1750        | 80        | 1623        | 327        | wood                  | Froggatt & Lowe (1990)            | 9         | 14,8          | 1        |          |                                                            |
| <b>WK1094</b>  | <b>39.7</b>  | <b>118</b>   | <b>1800</b> | <b>50</b> | <b>1666</b> | <b>284</b> | <b>wood</b>           | <b>Froggatt &amp; Lowe (1990)</b> | <b>44</b> | <b>j, 62</b>  | <b>1</b> | <b>b</b> |                                                            |
| NZ7482         | 34.4         | 128.6        | 1850        | 60        | 1738        | 212        | wood                  | Froggatt & Lowe (1990)            | 38        | 59            | 1        | a        |                                                            |
| NZ524          | 80.9         | 135          | 1775        | 75        | 1649        | 301        | wood                  | Froggatt & Lowe (1990)            | 26        | 9,39          | 1        |          |                                                            |
| NZ160          |              |              | 1300        | 80        |             |            | wood                  | Froggatt & Lowe (1990)            | 10        | 8             | 3        | d        | Not adjacent to tephra, too young                          |
| NZ869          |              |              | 1995        | 60        |             |            | wood                  | Froggatt & Lowe (1990)            | 28        | 39            | 2        | d        | No location data                                           |
| <b>WK424</b>   |              |              | <b>2040</b> | <b>50</b> |             |            | <b>wood</b>           | <b>Froggatt &amp; Lowe (1990)</b> | <b>40</b> | <b>16, 26</b> | <b>3</b> | <b>d</b> | Doubtful stratigraphy                                      |
| NZ525          |              |              | 2101        | 75        |             |            | wood                  | Froggatt & Lowe (1990)            | 27        | 9, 39         | 2        | d        | Doubtful stratigraphy                                      |

a Used but not tabled in HDK18

b Declared not used in HDK18

c Duplicate - different 1/2-life

d Discarded without mention in HDK18

#### Waikato dates bold

The remainder were either recalculations or declared in the footnote of the original table. The revised table includes 47 ages measured by the Rafter laboratory and 12 by the Waikato laboratory: 10 from Rafter and 1 from Waikato have been excluded, for reasons noted.

We do not cite dates from KB because the Taupo tephra has never been directly dated there. The unit encompassing the Kaharoa and Taupo tephras was truncated by erosion<sup>5</sup>.

We have not found published KB dates younger 3000 BP<sup>3,5-8</sup>.

## References

Froggatt, P. C. & Lowe, D. J. A review of late Quaternary silicic and some other tephra formations from New Zealand: Their stratigraphy, nomenclature, distribution, volume, and age. *N. Z. J. Geol. Geophys.* **33**, 89-109 (1990).

References in Froggatt & Lowe (1990) are listed in HDK18, Supplementary material.

Hogg, A., Lowe, D. J., Palmer, J., Boswijk, G. & Ramsey, C. B. Revised calendar date for the Taupo eruption derived by <sup>14</sup>C wiggle-matching using a New Zealand kauri <sup>14</sup>C calibration data set. *The Holocene* **22**, 439-449.

Holdaway, R. & Beavan, N. Reliable <sup>14</sup>C AMS dates on bird and Pacific rat *Rattus exulans* bone gelatin, from a CaCO<sub>3</sub>-rich deposit. *J. R. Soc. N. Z.* **29**, 185-211 (1999).

Pullar, W.A.; Kohn, B.P.; Cox, J.E. 1977. Airfall Kaharoa Ash and Taupo Pumice, and sea-rafterd Loiseles Pumice, Taupo Pumice, and Leigh Pumice in northern and eastern parts of the North Island, New Zealand. *N. Z. J. Geol. Geophys.* **20**, 697-717.
